# Supplementary material for: The synthesis of [2], [3] and [4]rotaxanes and semirotaxanes
Source: Royal Society of Chemistry journal article supplement (doi:10.1039/b109256c), 2002-01-01
Supplement: b109256c.doc [file b109256c.doc]

**Supplementary data**

**Pseudo[2]rotaxane 9**

**9**

1H-NMR (250 MHz, D2O):  = 3.55 (t, 2H, 3JHH = 6.5, **a**), 4.12-4.15 (s and t overlapped, 4H, **b**,**d**), 4.25 (dd, 12H, 2JHH = 15.5 Hz, **QQ**), 5.48 (s, 12H, **QQ**), 5.69 (dd, 12H, 2JHH= 15.5 Hz, **QQ**), 6.53 (s, 1H, **c**).

**Semi[2]rotaxane 10**

**10**

1H-NMR (400 MHz, D2O):  1.70 (s, 9H, **e**), 3.40 (t, 2H, 3JHH = 7.5 Hz, **a**), 3.99 (t, 2H, 3JHH = 7.5 Hz, **b**) , 4.22 (dd, 12H, **QQ**), 4.34 (s, 2H, **d**), 5.49 (s, 12H, QQ), 5.65 (dd, 12h, **QQ**), 6.56 (s, 1H, **c**).

**Semi[2]rotaxane 11**

**11**

1H-NMR (400 MHz, D2O):  1.58 (s, 9H, **e**), 3.74 (t, 2H, 3JHH = 7.5 Hz, **a**), 4.05 (s, 2H, **d**), 4.12 (t, 2H, 3JHH = 7.5 Hz, **b**), 4.23 (dd, 12H, **QQ**), 5.49 (s, 12H, QQ), 5.65 (dd, 12h, **QQ**), 6.50 (s, 1H, **c**).

13C-NMR (100 MHz, D2O, DSS):  28.82 (**e**), 39.46 (**a**), 41.18 (**b**), 49.14 (**d**), 54.13 (**QQ**), 54.35 (**QQ**), 60.92 (**f**), 73.18 (**QQ**), 123.17 (**Tr; =C-H**), 142.37 (**Tr; =C-R**), 159.24 (**QQ**), 159.49 (**QQ**).

## [3]rotaxane 12

**12**

1H-NMR (250 MHz, D2O):  1.48 (s, 18H, **j**), 2.59 (s, 6H, **g**), 2.92 (s, 3H, **f**), 3.45 (br, 4H, **a**), 3.77 (br, 4H, **b**), 4.17 (dd, 24 H, **QQ** + s, 4H, **e**), 4.85 (s, 4H, **d**), 5.48 (48H, QQ), 6.54 (s, 2H, **c**), 7.29 (s, 1H, **h**).

13C-NMR (100 MHz, D2O, DSS):  19.61 (**f**), 22.59 (**g**), 29.23 (**j**), 39.61 (**a**), 43.66 (**b)**, 50.28 (**d**), 54.18 (**QQ**), 54.20 (**QQ**), 62.44 (**i**), 73.32 (**QQ**), 125.25 (**Tr, =C-H**), 129.42 (**Ar, C4**), 133.52 (**Ar, C1**), 142.24(**Ar, C2+C6**), 143.71 (**Ar, C3+C5**), 144.26 (**Tr, =C-R**), 159.38 (**QQ**), 159.41 (**QQ**).

**Pseudo[3]rotaxane 13**

**13**

1H-NMR (250 MHz, D2O) :  = 2.75 (s, 6H, **f**), 3.06 (s, 3H, **g**), 3.37 (t, 4H, 3JHH= 6.5, **a**), 3.94 (t, 4H, 3JHH= 6.5, **b**), 4.17-4.28 (dd, 24H, **QQ**), 4.49(s, 4H, **d**), 4.63 (s, 4H, **e**), 5.48 (s, 24H, **QQ**), 5.61-5.75 (t, 24H, 2JHH= 16.1, **QQ**), 6.51 (s, 2H, **c**), 7.12 (s, 1H, **h**).

13C-NMR (100 MHz, D2O, DSS):  19.40 (**g**), 22.74 (**f**), 41.14 (**a**), 46.39 (**b**), 49.26 (**d**), 50.59 (**e**), 54.12 (**QQ**), 54.37 (**QQ**), 73.16 (**QQ)**, 122.92 (**Tr, =C-H**), 129.86 (**Ar, C4**), 133.82 (**Ar, C1**), 142.04(**Ar, C2+C6**), 143.44 (**Ar, C3+C5**), 143.97 (**Tr, =C-R**), 159.24 (**QQ**), 159.37 (**QQ**).

#### Synthesis of Pseudo[3]rotaxane 13 in 0.2 M Na2SO4 solution.

Compound7 (39.0 mg, 100.0 mol) and **4** (18.2 mg, 200 mol) were dissolved in water (5 ml) and stirred for 15 min at r.t. to obtain a light yellow coloured solution. A solution of **1** (200 mg, 200.0 mol) dissolved in 0.2 M NaSO4 (5 ml) under was added vigorous stirring. The resulting homogeneous solution was stirred at 40 C for 120 hrs before the solvent was removed under reduced pressure to yield **13** asa pale yellow solid. Yield: 254 mg, (100%, crude)

**13** (208 mg, 81 mol) was dissolved in water (10 ml). A 0.1 N NaOH solution (3.5 ml) was added and stirred for 3 hrs. The clear solution was extracted with chloroform (4 x 7 ml). The combined organic layers were washed with sat. aqueous NaCl solution (6 ml) and dried over anhydr. MgSO4. After filtration the solvent was removed under reduced pressure to yield **20** as acolourless oil.

Yield: 28.2 mg, (60%).

**20**

1H-NMR (CDCl3, 250 MHz):  1.66 (br, 6H, N**H**), 2.16 (s, 6H, **f**), 2.26 (s, 3H, **g**), 3.17 (t, 4H, 3JHH= 7.5 Hz, **a**), 3.74 (s, 4H, **e**), 3.94 (s, 4H, **d**), 4.43 (t, 4H, 3JHH= 7.5 Hz, **b**), 6.82 (s, 1H, **h**), 7.51 (s, 2H, **c**).

## [3]rotaxane 14

**14**

1H-NMR (250 MHz, D2O):  1.68 (s, 18H, **h**), 2.68 (s, 6H, **f**), 2.98 (s, 3H, **g**), 3.81 (t, 4H, 3JHH = 8.0 Hz, **a**), 4.03 (t, 4H, 3JHH = 8.0 Hz, **b**), 4.30 (dd, 24 H, **QQ** + s, 4H, **d**), 4.85 (s, 4H, **e**), 5.59 (s, 24H, **QQ**), 5.73 (t, 24H, **QQ**), 6.54 (s, 2H, **c**), 7.29 (s, 1H, **h**).

13C-NMR (100 MHz, D2O):  20.54 (**g)**, 29.16 (**h**), 42.91 (**a**), 42.83 (**b**), 49.17 (**d**), 50.67 (**e**), 54.32(**QQ**), 54.50 (**QQ**), 62.74 (**i**), 72.91 (**QQ**), 73.03 (**QQ**), 124.05 (**Tr, =C-H**), 130.22 (**Ar, C4**), 134.49 (**Ar, C1**), 141.86(**Ar, C2+C6**), 142.75 (**Ar, C3+C5**), 143.28 (**Tr, =C-R**), 159.36 (**QQ**), 159.71 (**QQ**).

###### Pseudo[4]rotaxane 15

**15**

1H-NMR (250 MHz, D2O):  = 3.12 (s, 9H, **f**), 3.42 (t, 6H, 3JHH= 6.5, **a**), 3.95 (t, 6H, 3JHH= 6.5, **b**), 4.30 (t, 36H, **QQ**), 4.60 (s, 6H, **e**), 4.75 (s, 6H, **c**, (overlapped with solvent peak)), 5.55 (s, 36 H, **QQ**), 5.75 (t, 36 H, **QQ**), 6.52 (s, 3H, **c**).

13C-NMR (100 MHz, D2O, DSS):  20.34 (**f**), 41.13 (**a**), 46.80 (**b**), 49.18 (**d**), 51.34 (**e**), 54.10 (**QQ**), 54.37 (**QQ**), 73.08 (**QQ**), 73.27 (**QQ**), 122.87(**Tr, =C-H**), 130.99 (**Ar, C1**), 142.02 (**Tr, =C-R**), 146.08 (**Ar, C2**) 159.19 (**QQ**), 159.24 (**QQ**).

## Synthesis of [4]rotaxane 16

# Cucurbituril 1 (150.0 mg, 151.0 mol) was dissolved in 6N HCl (4 ml ) and stirred at r.t. for 30 min. Trisalkyne 8 (21.7 mg, 50.3 mol) followed by azide 5 (27.0 mg, 151.0 mol) were added under vigorous stirring to obtain a clear solution which was further stirred at r.t. for 72 hrs. The solvent was removed under reduced pressure to yield a light yellow film which was suspended in hot water (4ml) at 80 ºC and stirred for 1 hr. Undissolved excess cucurbituril was removed by filtration. The remaining filtrate was precipitated into acetone (10ml) and a white precipitate was collected by centrifugation. This was dried in *vacuo* over P2O5 for one week to afford title compound 16.

Yield: 177.4 mg (89%) (with 35 H2O)

**16**

1H-NMR (400 MHz, D2O):  1.60 (s, 27H, **g**), 3.11 (s, 9H, **a**), 3.58 (m, 6H, **f**), 3.86 (m, 6H, **e**), 4.30 (m, 36H, **QQ**), 4.51 (s, 6H, **b**), 5.53 (s, 36H, **QQ**), 5.74 (t, 36H, **QQ**), 6.49 (s, 3H, **d**).

13C-NMR (100 MHz, D2O):  20.32 (**a)**, 28.41 (**g**), 42.91 (**f**), 43.33 (**e**), 49.95 (**c**), 50.22 (**b**), 54.12(**QQ**), 54.34 (**QQ**), 62.15 (**h**), 73.08 (**QQ**), 73.16 (**QQ**), 123.95 (**Tr, =C-H**), 130.99 (**Ar, C1**), 142.33 (**Tr, =C-R**), 145.24 (**Ar, C2**), 159.18 (**QQ**), 159.52 (**QQ**).

### 13C NMR of semi[2]rotaxane 11

**13C NMR of semi[3]rotaxane 13**

**13C NMR of semi[4]rotaxane 15**

**13C NMR of [4]Rotaxane 16**
